# Supplementary material for: Skin Involvement in Psoriatic Arthritis Worsens Overall Disease Activity, Patient-Reported Outcomes, and Increases Healthcare Resource Utilization: An Observational, Cross-Sectional Study
Source: Springer Nature journal article supplement (doi:10.1007/s40744-018-0120-8), 2018-07-06

Table S1. Patient demographics and clinical characteristics.

|                                                                     |                   |
|---------------------------------------------------------------------|-------------------|
| <b>Number of patients, n</b>                                        | 1201              |
| <b>Number of rheumatologists, n</b>                                 | 410               |
| <b>Age, mean (SD)</b>                                               | 48.86 (12.53)     |
| <b>BMI, mean (SD)</b>                                               | 26.78 (4.81)      |
| <b>Gender, n (%)</b>                                                |                   |
| Male                                                                | 559 (46.5)        |
| Female                                                              | 642 (53.5)        |
| <b>When was PsO diagnosed in relation to PsA?<sup>a</sup> n (%)</b> |                   |
| PsO before PsA                                                      | 856 (71.3)        |
| PsA before PsO                                                      | 74 (6.16)         |
| PsA/PsO diagnosed together                                          | 203 (16.9)        |
| No diagnosis of PsO                                                 | 68 (5.66)         |
| <b>BSA (%), n (%)<sup>b</sup></b>                                   |                   |
| <3% (Mild)                                                          | 198 (29.5)        |
| 3-10 (Moderate)                                                     | 262 (39.0)        |
| >10 (Severe)                                                        | 212 (31.6)        |
| n, included                                                         | 672               |
| n, missing                                                          | 529               |
| <b>BSA(%), median (IQR)<sup>b</sup></b>                             | 5.00 (2.0, 18.0)  |
| n, included                                                         | 672               |
| n, missing                                                          | 529               |
| <b>PASI, median (IQR)<sup>b</sup></b>                               | 0.00 (0.00, 3.90) |
| n, included                                                         | 1023              |
| n, missing                                                          | 178               |

<sup>a</sup>As determined by documentation of diagnosis prior to initiation of current treatment for PsA and selected from a pre-defined list.

<sup>b</sup>Data were not available for all patients.

SD, standard deviation; n, number of patients; BMI, body mass index; PsO, psoriasis; PsA, psoriatic arthritis; BSA, body surface area; PASI, psoriasis area severity index.

Table S2. Patient comorbidities ( $\geq 2\%$ ) documented as present prior to initiation of the current treatment for PsA in patients when stratified according to inclusion in the skin and joint group. All p-values from Fisher's exact test.

| <b>Comorbidity, n (%)<sup>a</sup></b>                     | <b>Overall<br/>n=1201</b> | <b>Not Included<br/>n=564</b> | <b>Included<br/>n=637</b> | <b>p-value</b> |
|-----------------------------------------------------------|---------------------------|-------------------------------|---------------------------|----------------|
| Anxiety                                                   | 113 (9.4)                 | 29 (5.1)                      | 84 (13.2)                 | <0.000         |
| Atopic dermatitis                                         | 19 (1.6)                  | 4 (0.7)                       | 15 (2.4)                  | 0.0343         |
| Chronic kidney disease (Mild)                             | 21 (1.7)                  | 7 (1.2)                       | 14 (2.2)                  | 0.2709         |
| COPD                                                      | 28 (2.3)                  | 14 (2.5)                      | 14 (2.2)                  | 0.8487         |
| Depression                                                | 104 (8.7)                 | 30 (5.3)                      | 74 (11.6)                 | 0.0001         |
| Diabetes mellitus                                         | 81 (6.7)                  | 33 (5.9)                      | 48 (7.5)                  | 0.2517         |
| Fibromyalgia                                              | 52 (4.3)                  | 21 (3.7)                      | 31 (4.9)                  | 0.3945         |
| Gastric condition<br>(not Peptic Ulcer or GI perforation) | 34 (2.8)                  | 12 (2.1)                      | 22 (3.5)                  | 0.222          |
| Hyperlipidemia                                            | 139 (11.6)                | 65 (11.5)                     | 74 (11.6)                 | 1              |
| Hypertension                                              | 230 (19.2)                | 88 (15.6)                     | 142 (22.3)                | 0.0033         |
| Obesity                                                   | 82 (6.8)                  | 35 (6.2)                      | 47 (7.4)                  | 0.4918         |
| Osteoporosis                                              | 35 (2.9)                  | 15 (2.7)                      | 20 (3.1)                  | 0.7317         |
| No comorbidities                                          | 783 (65.2)                | 396 (70.2)                    | 387 (60.8)                | 0.0007         |

<sup>a</sup>As determined by documentation of diagnosis prior to initiation of current treatment for PsA and selected from a pre-defined list.

Figure S1. Psoriasis area and severity index (PASI; A) and the percentage of body surfaced area (BSA) affected (B) correlations with physician classification of current skin severity. The numbers of included and missing patients out of those with skin status documented (n=1103) are provided for each measure. \*\*p<0.0001 calculated using Spearman's correlation.

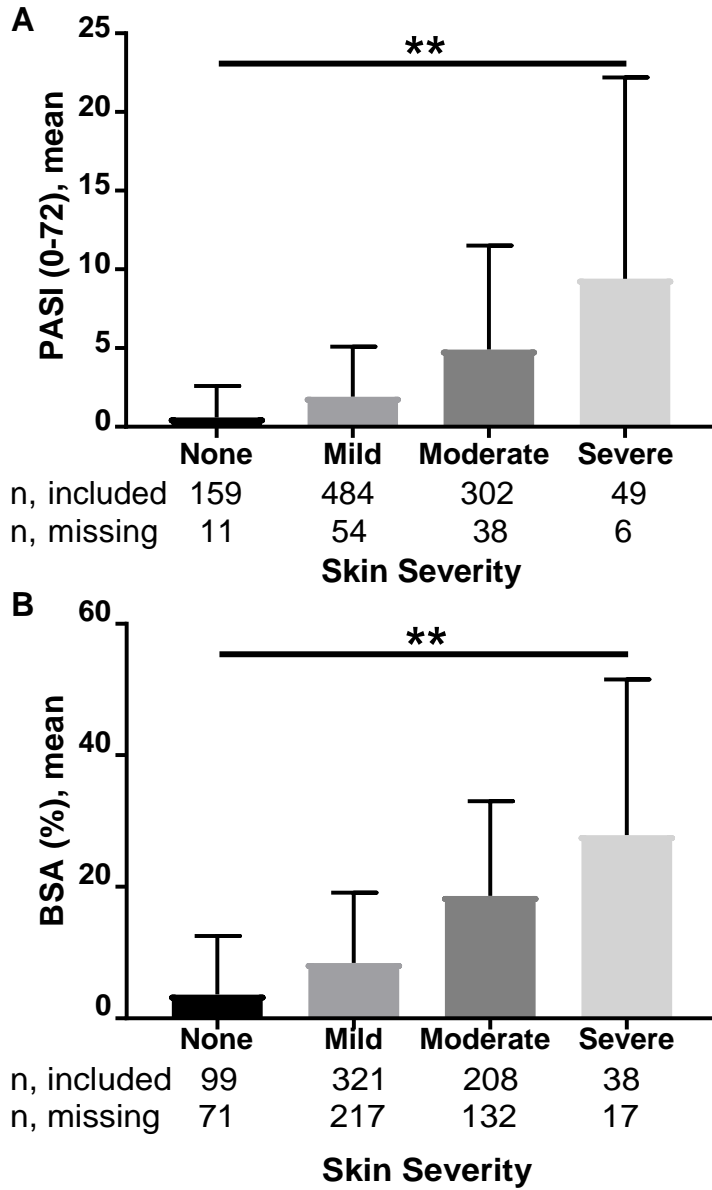

Supplement: MOESM1 [file 24439410]
